# Supplementary material for: One-pot surface modification of rubbery polymer films
Source: Royal Society of Chemistry journal article supplement (doi:10.1039/c1py00488c), 2011-12-02
Supplement: c1py00488c.pdf [file c1py00488c.pdf]

## Supporting Information

### One-pot surface modification of rubbery polymer films

Hirofumi Tsuruta, Yoshihisa Fujii and Keiji Tanaka\*

Department of Applied Chemistry, Kyushu University, 744 Motoooka, Nishi-ku, Fukuoka 819-0395, Japan

E-mail: k-tanaka@cstf.kyushu-u.ac.jp

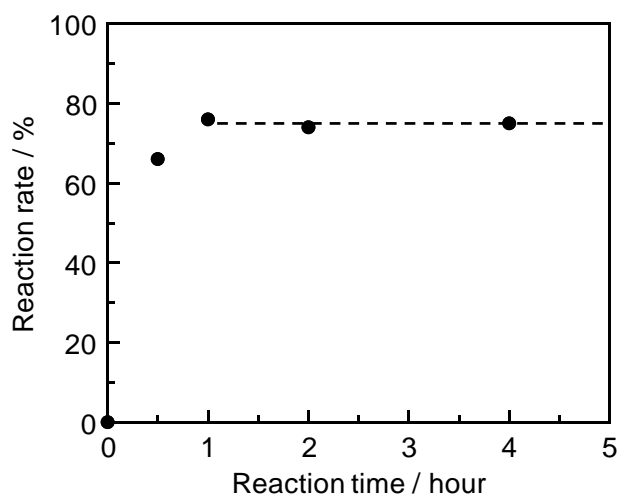

**Fig. S1** Sol-gel reaction rate for TEOS as a function of reaction time at 333 K evaluated by nuclear magnetic resonance. The broken line is drawn to guide the eye. In this study, we have chosen 2 hours as a reaction condition.

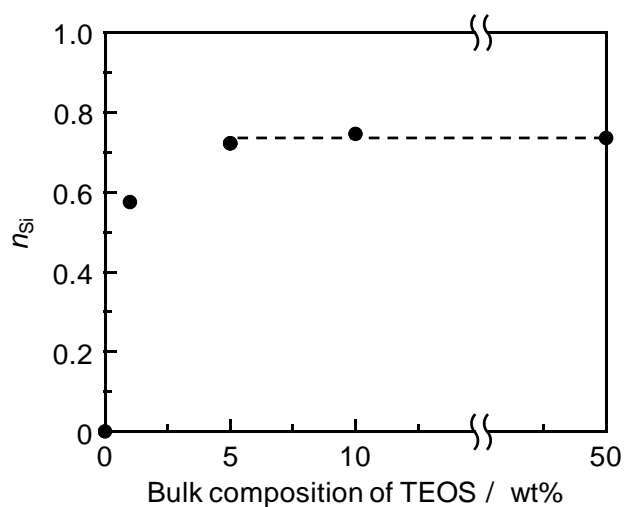

**Fig. S2** Atomic ratio of silicon to carbon ( $n_{Si}$ ) at the outermost surface of the PI/TEOS films with various bulk compositions of TEOS. The broken line is drawn to guide the eye.
